# Supplementary material for: Peanut oil is more environmentally sustainable than rapeseed oil from a carbon and nitrogen footprint perspective in China
Source: PeerJ. 2025 Aug 28;13:e19941. doi: 10.7717/peerj.19941 (PMC12399079; doi:10.7717/peerj.19941)
Supplement: Supplemental Information 1 [file peerj-13-19941-s001.xlsx]

## Sheet: agri-input data of peanut
Province	Year	Seed amounts (kg/mu)	Agricultural film (kg/mu)	Farm manure cost(RMB/mu)	Pesticides cost(RMB/mu)	Agricultural machinery cost (RMB/mu)	Fuel and power cost (RMB/mu)	Electricity cost (RMB/mu)	Planting area (10^3 ha)	Yield (t)	Fertilizer amounts (kg/mu)	Nitrogen fertilizer (kg/mu)	Urea (kg/mu)	Ammonium carbide (kg/mu)	Other nitrogen fertilizer (kg/mu)	Phosphate fertilizer (kg/mu)	Superphosphate (kg/mu)	Potassium fertilizer (kg/mu)	Potassium chloride (kg/mu)	Compound and mixed fertilizer (kg/mu)	Compound fertilizer (kg/mu)	Diammonium phosphate (kg/mu)	Three element compound fertilizer (kg/mu)	Mixed fertilizer (kg/mu)
Hebei	2004	16.32	1.74	11.6	10.48	17.76		0	448.9	1378522	14.97	5.27	3.84	1.43	0	1.1	0.74			8.6	7.58	5.05		1.02
Liaoning	2004	13.95	0.19	1.88	9.6	17.76		0	211.1	419110	19.79	8.08	8.08	0	0			0.99	0.99	10.72	6.12	4.71		4.6
Anhui	2004	17.38		8.08	6.31	17.83	0.4	0	254.4	953706	11.4	3.59	3.37	0.22	0	3.16	3.16			4.65	4.65	2.98
Fujian	2004	16.6		24.84	22.78	16.14	0.16	0	109.9	258796	15.5	4.77	2.36	2.05	0.36	2.99	2.12	1.92	0.77	5.82	5.35	0.25		0.47
Shandong	2004	15.3	2.65	8.13	14.01	28.43	0.41	0	925.3	3653002	15.75	2.25	0.96	1.28	0.01	0.53	0.28	0.46	0.17	12.51	11.14	1.45		1.37
Henan	2004	16.2		1.35	13.39	14.63		0	951.7	3063123	10.94	4.92	4.06	0.86	0	0.39	0.39			5.63	5.63	1.42
Guangdong	2004	11.69		20.7	13.54	11.43	0.26	1.25	308.1	764714	19.02	5.44	4.59	0.85	0	5.74	2.32	0.66	0.24	7.18	7.16			0.02
Guangxi	2004	13.32		43.38	11.15	22.84		0	236.5	514522	15.5	4.77	2.36	2.05	0.36	2.99	2.12	1.92	0.77	5.82	5.35	0.25		0.47
Sichuan	2004	8.63		5.47	1.54	0.77		5	262.7	598229	7.03	1.47	1.47	0	0	4	4	0.88		0.68	0.68
Hebei	2005	14.96	1.29	12.89	11.98	13.42	0.03	14.6	438.8	1403277	14.34	4	3.07	0.93	0	0.63	0.46	0.11	0.11	9.6	9.34	4.38		0.26
Liaoning	2005	14.13	0.24	5.83	6.03	19.15		0	172.4	330103	18.54	8.62	8.41	0.21	0	0.11	0.11	0.8	0.8	9.01	6.71	1.42		2.3
Anhui	2005	13.95	0.11	12.98	9.64	23.03		0	238.5	792898	13.7	3.62	3.32	0.3	0	4.6	4.6			5.48	5.48	3.94
Fujian	2005	19.02		10.05	24.43			0	107.2	254715	19.54	5.58	0.76	4.82	0	1.59	0.06	0.59	0.36	11.78	7.5			4.28
Shandong	2005	16.24	2.27	9.12	16	30.92	1.7	3.67	884.8	3598959	19.6	2.68	1.27	1.41	0	0.24	0.19	0.74	0.57	15.94	14.78	1.46		1.16
Henan	2005	14.5		0.58	16.02	18.49	0.44	4.02	979.3	3382991	9.57	4.03	4.03	0	0	0.2		0.71	0.7	4.63	4.63
Guangdong	2005	10.74		23.27	16.29	13.14		3.89	309.4	758596	17.8	5.9	5.08	0.82	0	4.59	1.64	0.82	0.57	6.49	6.33			0.16
Guangxi	2005	13.63		31.38	10.89	9.29		0	243.7	551339	14.11	3.96	3.65	0.31	0	6.28	2.63	2.49	2.49	1.38	1.16			0.22
Sichuan	2005	14.8		10.11	3.94			1.49	264	619987	8.2	2.77	1.16	1.54	0.07	1.99	1.99	0.37		3.07	3			0.07
Hebei	2006	17.9	1.16	15.71	10.53	22.89		17.58	425.1	1218672	16.47	3.37	2.8	0.5	0.07	0.36	0.18	0.1	0.06	12.64	12.49	7.92		0.15
Liaoning	2006	14.34	0.3	5.08	16.57	22.29		0.87	137.7	245000	20.53	8.19	8.16	0.03	0			1.37	1.37	10.97	10.31	2.24		0.66
Anhui	2006	17.52	0.58	8.8	10.24	26.79		0.38	218.4	693691	14.13	4.77	4.77	0	0	4.49	4.21			4.87	4.87	0.37
Fujian	2006	15.45		11.93	17.96	1.94	4.52	3.22	106.3	221450	13.61	3.3	1.35	1.95	0	0.77	0.12	0.14	0.02	9.4	9.05			0.35
Shandong	2006	15.18	2.25	4.94	16.96	38.61		2.15	857.9	3252626	21.78	1.81	0.68	1.13	0	0.06	0.06	0.52	0.41	19.39	18.89	3.39		0.5
Henan	2006	15.22		0.36	15.67	21.33		7.88	956.7	3531000	14.56	4.26	3.52	0.44	0.3	0.05	0.05			10.25	10.25	0.25
Guangdong	2006	11.64		23.02	16.38	16.2		5.14	308.2	765423	13.72	3.58	3.58	0	0	4.96	3.7	2.84	2.82	2.34	1.96			0.38
Guangxi	2006	13.82		26.6	11.1			0	246.8	318022	13.72	3.58	3.58	0	0	4.96	3.7	2.84	2.82	2.34	1.96			0.38
Sichuan	2006	15.63		9.93	5.22			0.24	260.9	434856	10.71	5.97	3.12	2.85	0	3.75	3.63	0.08		0.91	0.52			0.39
Hebei	2007	20.8	1.13	19.3	14.49	28.36		21.14	391.5	1306822	18.16	4.39	3.49	0.9	0	0.33	0.1			13.44	13.18	4.1		0.26
Liaoning	2007	15.65	0.1	2.7	17.36	29.62		0	98.7	250000	19.99	8.67	8.65	0.02	0					11.32	11.32	3.29
Anhui	2007	15.18	0.78	4.3	12.08	29.16		1.45	172.7	617642	14.7	4.02	4.02	0	0	5.24	5.07	0.17	0.17	5.27	4.33	0.63		0.94
Fujian	2007	16.62		6.85	41.75	3.89	0.87	0.87	90.6	219105	17.83	4.33	1.61	2.72	0	1.79	1.41	0.54		11.17	10.38			0.79
Shandong	2007	15.48	2.22	9.43	19.93	44.34	0.65	2.85	790.1	3255549	22.39	2.21	1.2	1.01	0	0.04	0.04	0.62	0.15	19.52	19.43	1.58		0.09
Henan	2007	15.57		0.63	15.67	26.23		3.54	947.8	3735946	13.81	2.99	2.99	0	0	0.27				10.55	10.55	0.48
Guangdong	2007	11.97		25.47	17.29	14.98		4.17	302.5	766562	20.82	5.58	5.35	0.23	0	4.09	4.09	1.27	1.27	9.88	9.63			0.25
Guangxi	2007	11.92		26.8	10.72	0.19	0.43	0	136.2	320353	16.35	3.8	3.8	0	0	5.93	5.49	3.77	3.77	2.85	2.44			0.41
Sichuan	2007	13.38		9.17	10.5			2.34	237.8	509562	13.79	7.13	0.95	6.18	0	4.91	0.66	0.19	0.13	1.56	1.44			0.12
Hebei	2008	20.52	1.24	12.87	15.72	37.05		15.58	409.9	1400727	13.81	2.81	1.66	1.15	0	0.1	0.04			10.9	10.07	2.5		0.83
Liaoning	2008	13.51	0.11	7.45	27.81	42.53		0	148.3	450740	14.89	4.55	4.5	0.01	0.04			0.01		10.33	10.21	2.4		0.12
Anhui	2008	16.95	1.25	5.43	14.15	41.24		0	194.5	778624	14.09	4.61	4.61	0	0	5.29	1.31	0.26	0.26	3.93	2.04			1.89
Fujian	2008	14.06		4.43	38.45	10.87	2.81	0	96	239547	13.77	5.78	3.77	2.01	0	1.55	1.51	0.2		6.24	6.21			0.03
Shandong	2008	15.17	2.45	13.23	24.32	57.87	0.95	1.72	800.5	3370879	22.88	2.29	1.09	1.2	0	0.03	0.03	0.16	0.09	20.4	19.95	1.36		0.45
Henan	2008	15.66		0.29	15.22	30.67		4.94	956.7	3845890	15.32	4.38	4.23	0.15	0	0.23	0.2			10.71	10.71	0.13
Guangdong	2008	10.9		23.32	21.59	27.33		2.65	314.1	805266	17.75	4.35	3.98	0.37	0	3.84	3.84	1.03	0.85	8.53	7.93			0.6
Guangxi	2008	12.97	0.25	29.81	15.99	13.47		0	145.2	353798	16.4	3.36	3.36	0	0	5.12	0.2	1.74	1.74	6.18	3.64			2.54
Sichuan	2008	18.04		8.56	2.17	4.4		3.12	256.2	589993	13.96	4.1	0.09	4.01	0	8.29	8.29	0.13	0.03	1.44	1.44
Hebei	2009	18.49	1.07	22.93	20.06	33.59		19.05	389.7	1339926	17.07	2.14	1.82	0.32	0	0.9	0.9	0.41	0.41	13.62	13.46	4.14	6.97	0.16
Liaoning	2009	12.08	0.1	3.3	24.76	40.55		0.84	260.6	534697	17.31	3.73	3.72	0.01	0			0.04		13.54	13.08	3.28	6.36	0.46
Anhui	2009	9.38	0.59	4.7	14.95	37.51		0	180.9	750893	14.34	4.79	4.79	0	0	4.16	4.16	0.65	0.65	4.74	4.74	0.18	3.99
Fujian	2009	12.77			27.48	30.31		1.4	98.1	246151	15.75	4.02	3.58	0.44	0	2.37	1.27	2.57	2.35	6.79	6.68	0.71	2.71	0.11
Shandong	2009	14.37	2.35	16.81	23.65	63.22	0.54	3.03	774.8	3308870	23.44	1.83	0.58	1.25	0	0.16	0.03	0.11	0.1	21.34	21.02	0.7	17.18	0.32
Henan	2009	13.31		0.01	21.72	35.51		7.61	975.4	4125600	17.02	6.49	5.52	0.97	0					10.53	10.53	0.31	3.11
Guangdong	2009	9.83		17.27	25.62	36.84		0.18	322.1	836268	18.63	3.77	3.56	0.21	0	4.25	4.25	0.69	0.69	9.92	9.92	0.04	9.39
Guangxi	2009	7.96	0.26	26.26	15.68	10.15		0	160.8	398154	14.37	3.01	3.01	0	0	2.38	0.02	0.61	0.61	8.37	6.77		2.08	1.6
Sichuan	2009	18.6		15.92	6.68			3.52	256.3	600963	14.85	6.24	1.39	4.85	0	4.19	4.19			4.42	4.42
Hebei	2010	17.91	1.33	7.81	19.18	46.53		19.13	367.4	1292279	17.77	3.53	3.1	0.43	0	0.36	0.36	0.14	0.14	13.74	13.74	3.08	8.01
Liaoning	2010	12.55	0.07	2.03	30.57	43.06		0	332.4	961477	17.31	3.73	3.72	0.01	0			0.04		13.54	13.08	3.28	6.36	0.46
Anhui	2010	12.71	0.21	1.61	19.1	38.64		0	194.6	864012	15.24	3.25	3.25	0	0	2.35	2.35			9.64	9.64	0.72	7.47
Fujian	2010	13.26		13.21	31.27	17.28		0	99.1	250291	16.19	4.52	2.74	1.78	0	0.56	0.52	0.28		10.83	10.67	0.35	7.96	0.16
Shandong	2010	15.51	2.3	11.63	24.95	64.68	0.9	3.01	805	3390438	24.05	1.64	0.52	1.12	0	0.07		0.17	0.05	22.17	21.97	1.19	17.94	0.2
Henan	2010	14.76		2.93	21.84	37.19		9.22	989.5	4276133	18.4	4	3.6	0.4	0	0.02	0.02			14.38	14.38		2.69
Guangdong	2010	11.34		22.34	27.7	53.9		0.53	328.5	871254	16.75	3.36	3.29	0.07	0	4.12	4.12	0.83	0.83	8.44	8.44		6.91
Guangxi	2010	7.51	0.47	20.88	17.36	26.4	1.71	0	170.3	435045	15.57	2.67	2.67	0	0	3.35	0.53	2.02	2.02	7.53	7.53		6.78
Sichuan	2010	15.94		14.77	7.09			0	259.3	615347	13.66	4.67	2.01	2.66	0	3.14	3.14			5.85	5.85
Hebei	2011	18.36	1.56	11.91	22.18	50.3		17.3	360.2	1289166	17.9	2.13	1.78	0.35	0	0.95	0.88	0.13	0.13	14.69	14.69	3.9	9.58
Liaoning	2011	12.34	0.07	0.56	28.28	50.7		0	377.1	1165363	15.93	2.93	2.93	0	0					13	13	1.58	8.11
Anhui	2011	13.4	0.72	5.64	20.83	41.23		2.19	188.9	843418	15.53	2.87	2.87	0	0	2.58	2.58	0.11	0.11	9.97	9.47	0.77	7.52	0.5
Fujian	2011	13.22		13.82	50.26	32.51		0	99.6	257026	20.38	8	4.86	3.14	0	1.24	1.13	2.5	2.47	8.64	8.64	0.19	4.87
Shandong	2011	15.33	2.45	10.32	27.83	70.19	2.18	4.29	797.1	3385850	23.94	2	0.86	1.08	0.06	0.17	0.1	0.26		21.51	21.34	0.82	16.23	0.17
Henan	2011	16.01		2.69	41.9	33.02		10.4	1010.6	4297921	17.08	4.03	3.04	0.99	0					13.05	11.8	0.28	4.21	1.25
Guangdong	2011	9.76		26.35	29.33	48.13		3	334.4	908468	18.7	4.26	3.89	0.37	0	4.13	4.13	1.88	1.88	8.43	8.43		8.33
Guangxi	2011	8.25	0.2	22.16	16.1	32.51	0.49	0	179.5	474564	14.28	2.14	2.14	0	0	3.32	0.42	1.94	1.94	6.88	6.54		6.54	0.34
Sichuan	2011	15.75		13.58	9.72			0	258.6	627455	16.05	3.87	2.66	1.21	0	8.96	8.96			3.22	3.22		1.43
Hebei	2012	18.1	1.73	26.09	19.89	72.38		18.55	354.5	1269417	18.19	2.25	2.02	0.23	0	0.49	0.49	0.2	0.2	15.25	15.25	3.98	9.96
Liaoning	2012	11.6	0.06	0.3	28.63	57.39		0	359.6	1165335	15.17	2.27	2.27	0	0					12.9	12.21	1.82	9.19	0.69
Anhui	2012	14.32	1	0.79	28.89	54.72		5.45	187.5	868553	18.17	5.52	5.52	0	0	1.55	1.55			11.1	11.1	0.6	10.35
Fujian	2012	13.04		2.02	46.42	34.67		0.75	100.3	262223	17.41	3.83	2.88	0.95	0	1.7	1.5	2.91	2.23	8.97	6.89	0.61	3.15	2.08
Shandong	2012	14.67	2.34	16.67	30.86	75.91	2.72	6.63	787.1	3486528	24.89	2.38	1.01	1.37	0					22.51	22.51	2.04	18
Henan	2012	16.66		1.24	47.66	63.1		28.3	1007.1	4540254	18.48	4.07	3.22	0.85	0	0.11				14.3	14.3		2.18
Guangdong	2012	9.05		19.42	40.3	79.17		1.87	343.2	955209	15.95	2.19	1.99	0.2	0	3.13	3.13	0.32	0.32	10.31	10.31		10.31
Guangxi	2012	8.51	0.23	31.56	22.86	47.41		0	188.8	512906	16.08	3.03	3.03	0	0	4.23	2.08	1.33	1.33	7.49	6.05		3.89	1.44
Sichuan	2012	17.12		12.86	9.87			0	262	648165	16.56	4.88	3.5	1.38	0	8.12	8.12			3.56	3.56		1.99
Hebei	2013	17.97	1.59	12.11	19.16	73.56		19.5	355.6	1300757	18.31	3.06	2.92	0.14	0	0.55	0.49	0.23	0.23	14.47	14.47	4.17	6.73
Liaoning	2013	16.12	0.05	0.45	37.6	75.2		0	341.5	1112920	16.69	2.02	2.01	0.01	0					14.67	14.51	1.39	13.06	0.16
Anhui	2013	13.94	0.63	0.43	23.38	52.24		0	187.3	886550	16.59	3.21	3.21	0	0	1.54	1.54			11.84	11.17	0.71	6.29	0.67
Fujian	2013	14.89		6.26	50.6	30.22		0	101.7	268786	17.98	6.81	4.87	1.94	0	0.83	0.7	2.03	1.85	8.31	8.09		4.29	0.22
Shandong	2013	15.11	2.4	17.15	28.29	82.68		5.75	780.3	3456820	25.11	2.61	1.21	1.4	0			0.02	0.02	22.48	22.48	0.96	18.68
Henan	2013	17.45			50.47	69.68		13.87	1037.3	4713729	18.64	3.9	3.9	0	0					14.74	14.74	0.16	6.49
Guangdong	2013	10.61		19.21	37.46	91.97		7.94	351	998484	15.98	3.06	2.57	0.49	0	2.94	2.94	0.82	0.82	9.16	9.16		8.35
Guangxi	2013	8.59	0.14	36.35	29.7	63.79		0	194.9	540985	17.5	2.7	2.7	0	0	2.87	0.05	1.73	1.43	10.2	9.46	0.22	5.68	0.74
Sichuan	2013	16.28		13.61	10.18			0	259.9	653859	14.9	5.04	3.83	1.21	0	6.74	6.74			3.12	3.12		1.64
Hebei	2014	17.89	1.49	8.06	19.62	79.69		21.68	352.5	1292406	19.24	3.99	3.84	0.15	0	0.38	0.38	0.1		14.77	14.77	3.7	8.74
Liaoning	2014	11.9	0.05	0.09	26.36	65.03	0.06	0.75	305.6	620365	15.03	1.63	1.63	0	0			0.01	0.01	13.39	12.92	1.54	10.89	0.47
Anhui	2014	14.43	0.57	7.97	19.87	43.87		0	190.4	943537	17.45	3.55	3.55	0	0	1.19	1.19			12.71	12.71	2.35	7.87
Fujian	2014	12.83		5.5	47.08	22.67		7.32	103.3	278042	17.08	5.94	3.61	2.33	0	0.14	0.08	1.78	1.68	9.22	9.22	0.2	1.46
Shandong	2014	15.09	2.5	15.83	29.85	91.58	4.73	11.33	755.3	3312957	26.25	2.27	1.05	1.22	0					23.98	23.96	0.84	21.38	0.02
Henan	2014	17.12			48.23	60.26		20.12	1058.3	4712882	19.07	4.11	4.11	0	0					14.96	14.96	0.35	7.02
Guangdong	2014	9.11		11.4	36.44	98.99		0	357.4	1043096	15.42	1.8	1.71	0.09	0	2.42	2.42	0.9	0.9	10.3	9.98		9.63	0.32
Guangxi	2014	8.22		43.52	33.07	70.38		0	204.3	575721	17.98	1.91	1.91	0	0	3.31	0.52	1.18	1.18	11.58	11.16		8.09	0.42
Sichuan	2014	17.1		14.16	9.8			0	261.1	666452	13.92	5.69	4.64	1.05	0	4.12	4.12			4.11	4.11		2.37
Hebei	2015	17.31	1.43	10.8	19.2	77.89		26.61	342.9	1274146	18.79	3.78	3.63	0.15	0	0.46	0.46	0.32	0.32	14.23	14.23	3.88	8.15
Liaoning	2015	12.21	0.05		28.28	66.2	0.11	4.42	277.8	447730	15.11	1.2	1.2	0	0			0.02	0.02	13.89	13.19	2.92	8.91	0.7
Anhui	2015	14.83	0.35	10.63	20.36	44.52	1.65	0	191.1	944278	13.3	1.08	1.08	0	0	0.71	0.71			11.51	11.51	0.49	9.33
Fujian	2015	13.4		10.21	20.3	15.6		16.16	104.8	285966	13.65	5.75	2.56	3.19	0	2.1	1.76	0.34		5.46	5.46		5.09
Shandong	2015	15.09	2.58	14.97	31.07	94.03	5.16	10.78	740.4	3194038	26.7	1.55	0.59	0.96	0	0.04	0.04			25.11	24.75	0.96	21.73	0.36
Henan	2015	17.97		0.31	51.76	72.3		15.7	1074.6	4853100	22.48	5.31	5.31	0	0					17.17	17.17	0.79	8.51
Guangdong	2015	10.48		8.66	38.75	97.91		0.22	365.9	1090407	16.17	1.86	1.45	0.41	0	1.95	1.95	0.3	0.3	12.06	11.24		11.23	0.82
Guangxi	2015	8.21		24.93	31.97	80.59		0	214.3	606960	20.33	1.63	1.63	0	0	2.5	0.83	1.15	1.15	15.05	14.92	0.2	12.44	0.13
Sichuan	2015	17.9		12.41	10.29			0	263	678353	13.48	5.61	4.46	1.15	0	4.1	4.1			3.77	3.77		2.32
Hebei	2016	17.3	1.66	7.75	20.11	95.4		24.91	342.3	1026794	18.59	2.41	2.41	0	0	0.56	0.56	0.47	0.47	15.14	15.14	2.89	10.4
Liaoning	2016	11.93	0.04	0.2	32.67	76.7		5.73	281.3	759264	15.54	0.41	0.41	0	0					15.13	14.47	2.48	10.75	0.66
Anhui	2016	14.82	1.42	5.94	25.8	94.34		0	183.1	687107	20.63	3.65	3.65	0	0	0.24	0.24			16.75	16.75	1.55	13.16
Fujian	2016	11.83		13.91	43.65	34.26		7.12	105.7	185992	13.63	4.09	2.49	1.6	0	1.32	1.32	1.76	1.46	6.47	6.11		4.12	0.36
Shandong	2016	14.87	2.67	20.44	33.77	96.73	4.98	13.98	739.7	3121341	26.81	1.52	1.3	0.22	0	0.02	0.02			25.26	25.15	0.97	20.44	0.11
Henan	2016	18.56			53.52	74.17		13.7	1128.2	4942675	21.42	5.29	5.29	0	0	0.3	0.17			15.84	15.84	0.82	7.64
Guangdong	2016	10.16		6.83	35.53	99.6		0.72	369	954831	16.88	2.81	2.23	0.58	0	3.55	3.44	3.21	2.83	7.3	7.24		7.24	0.06
Guangxi	2016	8.26		31.78	29.75	88.19	0.52	0	221.3	584003	20.95	1.67	1.67	0	0	4.24	2.74	2.74	2.74	12.29	12.16	0.27	10.59	0.13
Sichuan	2016	18.1		13.17	10.19	11.27		0	264.4	647812	13.98	4.6	4.6	0	0	5.03	5.03			4.34	4.34		2.17
Hebei	2017	17.47	1.73	6.62	19.15	98.66		25.82	266.8	1034076	19.32	2.74	2.74	0	0	0.1	0.1	0.05		16.43	16.43	4.72	10.28
Liaoning	2017	11.98	0.05	0.42	37.69	79.44	1.25	4.15	271.7	800159	17.25	1.85	1.85	0	0					15.41	14.79	2.4	10.93	0.62
Anhui	2017	18.09	1.15	5.61	33.87	63.76	0.69	0	138.9	687564	19.25	2.36	2.36	0	0	0.83	0.83			16.06	16.06	0.64	13.29
Fujian	2017	13.7		8.58	28.76	18.37	4.17	5.84	67.1	187283	14.74	5.45	3.42	2.03	0	4.08	2.5	0.29		4.92	4.92		3.34
Shandong	2017	15.11	2.68	18.7	35.97	94.62	5.76	12.86	709.2	3135284	25.11	0.53	0.37	0.16	0			0.37	0.17	24.22	24.2	0.51	19.85	0.02
Henan	2017	18.51			61.03	76.17		13.97	1151.9	5298139	23.04	4.19	4.19	0	0	0.09	0.09			18.75	18.75	1.55	9.98
Guangdong	2017	9.96	0.06	5.48	36.5	99.76		0	319.1	984178	15.99	2.57	2.33	0.24	0	2.83	2.73	1.18	1.18	9.4	8.42		8.42	0.98
Guangxi	2017	8.19		26.19	30.47	89.16	0.74	0	206	608011	23.43	1.33	1.33	0	0	5.3	3.7	1.16	1.16	15.63	15.41		13.82	0.22
Sichuan	2017	18.16		13.34	10.31	28.58		0	261.1	659928	13.32	4.54	4.54	0	0	5.01	5.01			3.77	3.77		3.77
Hebei	2018	17.46	1.89	6.13	20.68	103.19		26.41	258.1	984526	18.67	2.83	2.83		0					15.85	15.85	4.42	9.37
Liaoning	2018	12.08	0.06	0.26	41.36	106.83		6.14	286.1	768192	19.07	0.7	0.7	0	0					18.37	18.37	0.41	13.47
Anhui	2018	14.4	0.94	7.04	33.68	69.56	0.39	0	144.2	710548	20.91	3.38	3.38	0	0	0.43	0.43			17.11	17.11	0.47	14.01
Fujian	2018	11.94		5.36	30.99	41.87	7.52	8.41	69.6	203191	12.36	3.28	2.52	0.76	0	2.03	1.3	0.16		6.89	6.89		3.35
Shandong	2018	14.82	2.55	17.26	36.85	100.44	7.1	10.51	695.3	3066694	26.5	0.44	0.26	0.18	0	0.14	0.02			25.92	25.92	0.39	21.33
Henan	2018	18.18		7.94	62.8	82.92		15.54	1203.2	5724379	23.58	3.91	3.91	0	0	0.16	0.16	0.02		19.5	19.5	2.04	10.87
Guangdong	2018	10.74	0.16	7.16	39.91	101.03		0	332.5	1044022	15.56	2.55	2.34	0.21	0	3.34	3.26	1.37	1.35	8.29	8.03		8.03	0.26
Guangxi	2018	8.33		26.2	31.8	96.64	2.1	0	211.5	626737	24.96	1.26	1.26	0	0	4.96	3.56	0.94	0.94	17.79	17.5		15.75	0.29
Sichuan	2018	18.13		13.76	10.85	43.65		0	263.5	676720	13.97	4.68	4.68	0	0	4.72	4.72			4.57	4.57		2.7
Hebei	2019	17.72	1.75	6.31	20.86	101.13		26.72	250.2	964557	18.35	1.74	1.74		0					16.61	16.61	2.99	12.64
Liaoning	2019	12.68	0.06		47.01	114.06		6.37	289.2	964442	19.9	0.49	0.49	0	0					19.41	19.41	0.39	13.52
Anhui	2019	16.79	1.43	5.5	40.9	85.73	0.94	0	142.2	705639	23.45	3.64	3.64	0	0	0.23	0.23			19.58	19.58	1.25	17.04
Fujian	2019	10.89		8.6	30.67	38.36	1.26	1.06	71.5	210403	12.41	3.54	2.68	0.86	0	2.58	1.92	0.14		6.16	6.16		4.67
Shandong	2019	14.81	2.54	9.63	37.77	120.99		8.7	666.5	2847623	25.64	0.22	0.13	0.09	0	0	0	0.2		25.22	23.94	0.48	19.33	1.28
Henan	2019	18.29		10.24	65.2	96.66	7.7	17.4	1223.1	5767210	23.45	3.85	3.85	0	0	0.33	0			19.28	19.28	0.46	13.61
Guangdong	2019	10.96	0.25	8.89	44.28	127.32	0.79	0	340.5	1086852	17	2.64	2.21	0.43	0	3.21	3.21	1.26	1.26	9.9	9.9		9.71
Guangxi	2019	8.37		12.09	31.03	110.79	1.85	0	218.5	672048	22.45	0.81	0.81	0	0	5.86	1.83	2.4	1.94	13.37	13.11		9.63	0.26
Sichuan	2019	18.01		13.49	10.83	41.2		0	264.7	683715	13.67	4.27	4.27	0	0	4.09	4.09			5.31	5.31		3.28
Hebei	2020	19	1.71	5.2	26.67	104.49		29.42	246	968123	18.55	2.09	2.09	0	0					16.45	16.45	3.14	11.64
Liaoning	2020	13.14	0.07		58.25	114.46	0.15	14.29	306.2	987415	20.86	1.93	1.93	0	0					18.93	18.93	0.39	11.51
Anhui	2020	20.6	1.47	5.45	41.79	89.31	0.64	0	145.8	723250	23.51	3.85	3.85	0	0	0.24	0.24			19.42	19.42	0.51	15.99
Fujian	2020	11.35	2.61	9.7	45.8	30.29	2.05	5.56	73.2	216807	13.36	3.44	2.74	0.7	0	2.58	1.45	0.11		7.25	7.25		5.46
Shandong	2020	14.32		13.01	37.46	114.52	4.53	5.75	650.9	2866416	28.08	0.34	0.22	0.12	0			0.13		27.6	27.6	0.37	22.61
Henan	2020	18.11		10.17	70.47	102.01		15.31	1261.8	5949338	25.14	4.6	4.6	0	0					20.54	20.54	1.09	16.04
Guangdong	2020	10.85	0.26	6.7	51.23	115.89	0.64	0	347.6	1120539	16.32	1.9	1.47	0.43	0	3.28	3.28	0.6	0.6	10.55	10.55		9.82
Guangxi	2020	8.69		10.4	50.15	119.62	1.71	0	223.3	692265	23.17	0.76	0.76	0	0	8.83	8.37	0.57	0.57	13	13		11.28
Sichuan	2020	18.25		13.38	11.24	39.91		0	283.4	737808	14.16	4.45	4.45	0	0	3.45	3.45			6.27	6.27		4.13
Hebei	2021	18.91	1.89	5.53	31.83	107.88		27.31	247.3	963000	18.74	2.07	2.07					0.04		16.63	16.63	2.77	13.86
Liaoning	2021	13.67	0.06	1.61	53.95	152.3	0.05	4.68	332.3	1155000	21.56	1.21	1.21							20.34	19.88	0.43	12.91	0.46
Jilin	2021	9.42	0.28		32.64	143.63		0	242.6	833000	15.78									15.78	15.78		0.95
Anhui	2021	15.6	1.58	4.19	44.73	100.11	1.1	0.87	146.2	718000	23.77	3.71	3.71			0.32	0.32			19.74	19.74	0.35	18.49
Fujian	2021	11.46		17.75	34.91	41.08	9.68	8.79	73.7	222000	14.05	2.6	1.87	0.73		2.84	1.98	0.65	0.65	7.98	7.27		4.04 0.71
Jiangxi	2021	16.25		9.79	57.88	79.82		6.23	177.2	536000	22.4	5.48	5.48			2.09	1.51	0.94	0.94	13.89	13.89		13.89
Shandong	2021	14.2	2.71	14.1	42.51	116.92	4.5	4.53	631.7	2818000	28.32	0.18	0.1	0.08						28.14	27.95	0.71	21.48	0.19
Henan	2021	17.68		9.68	70.8	99.4		8.91	1292.9	5882000	25.31	4.96	4.72	0.24						20.35	20.35	0.3	16.98
Hubei	2021	14.67	1.05	13.19	23.32	55.59	5.47	0	244.7	863000	13.53	0.58	0.58							12.96	12.96		10.69
Hunan	2021	9.58		42.2	20.00	144.01		0	114	307000	9.06									9.06	9.06
Guangdong	2021	9.25	0.22	7.93	55.86	106.14		0	349.7	1159000	16.77	2.46	1.60	0.86		3.01	3.01	0.77	0.77	10.52	10.52		10.52
Guangxi	2021	8.55	0.03	6.69	51.55	143.31	1.92	0	226.3	711000	23.32	0.66	0.66			8.48	8.01	4.07	4.07	10.1	10.1		8.56
Sichuan	2021	18.28		13.08	10.9	43.55		0	290.2	762000	15.22	4.36	4.36			3.36	3.36			7.5	7.5		4.43
Hebei	2022	18.36	2.27	6.93	30.71	116.69		27.52	232.4	926000	18.81	2.4	2.4							16.41	16.41	2.82	12.16
Liaoning	2022	13.87	0.06		104.62	191.90	0.05	4.15	308.6	1125000	21.84	1.22	1.22							20.63	19.98	0.61	10.27	0.65
Jilin	2022	9.54			36.94	150.6		0	213.8	794000	16.75									16.75	16.75		2.37
Anhui	2022	15.36	1.56	3.08	47.66	102.97	1.25	0	146.1	724000	24.78	4.53	4.53							20.26	20.26	0.21	17.75
Fujian	2022	10.63		17.87	37.76	44.53	2.47	8.56	74.2	224000	13.01	4.01	3.17	0.84		2.31	1.67	0.53	0.45	6.15	6.15		2.33
Jiangxi	2022	16.42		7.56	68.02	88.41		13.28	181	546000	22.73	6.34	6.34			1.71	1.38	0.82	0.82	13.87	13.87		13.87
Shandong	2022	14.17	2.78	14.9	50.53	132.01	5.53	6.71	609.8	2701000	27.56	0.29	0.21	0.08						27.28	26.54	0.44	22.07	0.74
Henan	2022	18.12		16.66	73.60	108.5		19.59	1287.1	6154000	26.07	5.64	5.44	0.2						20.43	20.43	0.36	15.86
Hubei	2022	14.39	1.18	13.63	27.12	58.02	5.82	0	242.9	854000	13.2	0.49	0.21	0.28						12.7	12.7		10.64
Hunan	2022	8.59		46.14	23.88	143.35		0	115.4	311000	7.84									7.84	7.84		1.83
Guangdong	2022	9.1	0.21	7.03	55.48	112.34	0.42	0	346.8	1159000	16.64	2.43	1.92	0.51		3.29	3.29	0.55	0.55	10.38	10.38		10.04
Guangxi	2022	8.69		6.53	54.4	150.97	1.01	0	224.7	717000	18.10	0.74	0.74			3.19	1.76	0.94	0.94	13.24	13.24		12.06
Sichuan	2022	18.66		12.85	11.84	45.06		0	295.4	785000	15.27	4.32	4.32			3.39	3.39			7.56	7.56		4.47

## Sheet: agri-input data of rapeseed
Province	Year	Seed amounts (kg/mu)	Agricultural film (kg/mu)	Farm manure cost	Pesticides cost	Agricultural machinery cost (RMB/mu)	Fuel and power cost (RMB/mu)	Electricity cost (RMB/mu)	Planting area (10^3 ha)	Yield (t)	Fertilizer amounts (kg/mu)	Nitrogen fertilizer (kg/mu)	Urea (kg/mu)	Ammonium carbide (kg/mu)	Other nitrogen fertilizer (kg/mu)	Phosphate fertilizer (kg/mu)	Superphosphate (kg/mu)	Potassium fertilizer (kg/mu)	Potassium chloride (kg/mu)	Compound and mixed fertilizer (kg/mu)	Compound fertilizer (kg/mu)	Diammonium phosphate (kg/mu)	Three element compound fertilizer (kg/mu)	Mixed fertilizer (kg/mu)
Jiangsu	2004	0.28	0.01	5.88	10.71	9.42		0	689.9	1673230	18.21	10.42	9.02	1.4		1.82	1.37	0.05	0.05	5.92	4.8	0.35		1.12
Zhejiang	2004	0.24	0.02	7.56	7.08	5.2		0	215.8	434816	22.02	15.59	12.11	3.48		3.3	3.3	0.08	0.08	3.05	2.45			0.6
Anhui	2004	0.49		5.27	6.5	9.41		0	1003.3	1904173	15.94	10.19	8.81	1.38		0.72	0.72	0.04	0.04	4.99	4.5	3.65		0.49
Jiangxi	2004	0.42		2.75	5.63	5.13		0	400.5	400887	11.75	5.68	5.06	0.62		1.59	1.59	2.24	2.24	2.24	1.85			0.39
Henan	2004	0.62		3.94	1.8	23.07		0	373.8	780909	8.61	7.65	1.5	5.48	0.67					0.96	0.66			0.3
Hubei	2004	0.49		3.4	5.43	7.31		0	1186.1	2351184	13.77	7.97	2.36	5.61		2.48	2.2	0.51	0.47	2.81	1.58	0.06		1.23
Hunan	2004	0.23		6.2	7.8			0	728.2	1069674	6.13	5.16	3.27	1.86	0.03	0.87	0.87	0.05	0.05	0.05				0.05
Chongqing	2004	0.46		10	1.57			0	173.8	309876	11.46	7.15	3.63	3.51	0.01	3.87	3.87	0.09	0.08	0.35	0.27			0.08
Sichuan	2004	0.74		11.12	5.07			0	814.4	1649625	13.58	9.15	4.82	4.33		2.2	2.14			2.23	1.76	1.3		0.47
Guizhou	2004	0.44	0.01	30.07	5.36	0.95		0	482.4	739343	12.63	7.13	6.9	0.22	0.01	2.75	2.4			2.75	1.7	0.16		1.05
Yunnan	2004	2.29		22.23	11.86	4.21		0	147.9	262286	17.79	9.46	7.16	2.13	0.17	5.04	5.02	0.94	0.79	2.35	1.88			0.47
Shaanxi	2004	0.22		7.3	3.44	5.44		0	173.2	294460	14.97	8.28	2.95	5.27	0.06	2.03	1.03	0.14		4.52	4.17	1.1		0.35
Gansu	2004	1.03		13.4	4.8	19.71		0	162	259554	15.16	8.52	7.08	1.44		3.22	1.16			3.42	3.31	3.08		0.11
Qinghai	2004	0.91		9.64	6.19	22.91		0	157.7	282576	12.28	4.99	4.99			0.44	0.44			6.85	6.77	6.77		0.08
Jiangsu	2005	0.27		4.68	11.25	12.52	0.36	1.2	660.5	1586655	20.21	10.15	8.57	1.45	0.13	1.65	1.52	0.03	0.03	8.38	7.32	0.44		1.06
Zhejiang	2005	0.21		2.01	9.13	6.19		1.14	227.2	446848	23.19	14.99	11.39	3.6		3.13	2.96	0.23	0.23	4.84	4.74			0.1
Anhui	2005	0.36		4.54	5.27	14.63	0.71	2.54	953.6	1823277	14.96	7.01	6.11	0.9		2.29	1.13	0.28	0.23	5.38	5.31	1.13		0.07
Jiangxi	2005	0.78		8.04	5.93	3.89		0	409.7	416814	12.76	5.73	5.5	0.23		2.13	1.27	1.31	1.31	3.59	2.57			1.02
Henan	2005	0.5		3.86	3.76	14.02		0.24	407.8	877075	11.39	8.59	1.33	7.26		1.63	1.28	0.88	0.43	0.29	0.29
Hubei	2005	0.44		2.65	6.4	11.39		1.52	1178.7	2191484	14.59	6.98	2.31	4.67		2.75	2.68	0.37	0.37	4.49	3.61	0.02		0.88
Hunan	2005	0.22		8	7.96			0.94	752.2	1082129	10.09	5.78	4.08	1.7		2.03	2.03	0.18	0.18	2.1	2.1
Chongqing	2005	0.74		6.67	0.73	0.03		0	187.3	318138	8.56	5.46	1.89	3.57		2.89	2.77			0.21	0.21
Sichuan	2005	0.2		12.7	7.83	3.24		0.78	817.2	1687484	13.29	8.5	3.55	4.19	0.76	2.32	2.17	0.21	0.02	2.26	1.95			0.31
Guizhou	2005	0.33		20.71	2.82	0.02		0	504.8	765125	12.35	6.38	6.19	0.15	0.04	2.4	2.37	0.02	0.02	3.55	3.37	0.01		0.18
Yunnan	2005	0.82		16.01	9.9	14.36		0.51	169.1	290210	20.68	11.11	9.74	1.09	0.28	4.7	4.62	2.51	2.07	2.36	2.22			0.14
Shaanxi	2005	0.29		3.01	5.23	10.09		0.32	178.7	303254	18.07	7.75	3.13	4.62		5.5	2.93	1.7	1.32	3.12	3.12	2.34
Gansu	2005	1.45		11.41	7.72	20.28		0.83	157.3	266363	16.06	8.41	7.02	1.39		3.26	2.63			4.39	4.39	3.9
Qinghai	2005	0.8		8.77	6.68	26.19		0.2	159.7	315700	11.81	4.62	4.62			0.85	0.35			6.34	6.34	6.34
Jiangsu	2006	0.26		5.54	12.01	15.25		1.02	608.6	1290021	18.39	9.19	7.96	1.23		1.12	1.05			8.08	7.02	0.27		1.06
Zhejiang	2006	0.31		2.26	10.94	6.15		1.6	213.5	300560	21.47	13.33	10.73	2.6		4.03	3.75	0.14	0.14	3.97	3.05			0.92
Anhui	2006	0.26		8.03	7.88	18.19	1.3	0.57	835.6	1300708	17.24	8.3	7.09	1.21		1.79	1.77	0.1	0.1	7.05	5.56	0.49		1.49
Jiangxi	2006	0.7		6.86	4.78			0.16	418.7	424272	11.25	5.17	4.82	0.35		1.86	0.83	1.23	1.23	2.99	2.97			0.02
Henan	2006	0.66		4.65	3.99	8.16		0.22	371.3	792000	11.84	7.88	1.36	6.52		0.04				3.92	3.92	0.16
Hubei	2006	0.41		2.85	6.24	11.69		1.79	1081.3	1918299	15.22	7.68	2.21	5.47		3.04	2.94	0.43	0.39	4.07	3.51	0.02		0.56
Hunan	2006	0.19		8.95	7.25			1.37	767.3	910091	10.96	5.32	2.41	2.91		2.76	2.76	0.14	0.14	2.74	2.74
Chongqing	2006	0.42		10.76	2.32			0	183.7	234687	10.34	7.81	3.64	4.05		2.4	2.02			0.13	0.04			0.09
Sichuan	2006	0.23		14.05	7.34	10.45		0.01	797.4	1583527	13.88	9.07	2.08	6.99		2.74	2.62	0.12	0.06	1.95	1.93	0.11		0.02
Guizhou	2006	0.18		23.9	2.42	0.56		0	512.9	631780	12.02	5.44	5.42	0.02		4.3	4.16			2.28	2.18			0.1
Yunnan	2006	0.86		20.45	10.34	13.39		0.53	169.3	197318	18.47	10.16	8.79	1.3	0.07	3.65	2.95	1.19	0.86	3.47	2.58			0.89
Shaanxi	2006	0.23		7.02	3.96	8.5		2.55	172.2	252506	16.98	8.84	2.32	6.52		2.79	1.83	0.19		5.16	4.62	1.05		0.54
Gansu	2006	0.85		12.73	7.01	24.04		0	162.4	248530	14.26	7.03	5.47	1.56		3.46	3.14			3.77	3.77	3.42
Qinghai	2006	0.72		12.05	7.63	28.49		0.29	157.4	241800	11.73	4.63	4.63			0.71	0.71			6.39	6.39	6.39
Jiangsu	2007	0.25		5.38	12.62	15.49		1.53	434.4	1094587	19.61	9.41	8.51	0.9		1.11	1.06			9.09	8.09	0.33		1
Zhejiang	2007	0.27		3.09	11.78	6.28		0.85	128.8	271855	22.86	14.96	12.37	2.59		4.33	3.99	0.16	0.16	3.41	2.21			1.2
Anhui	2007	0.27		6.64	8.01	23.19	1.25	0.97	619.8	1299163	16.5	7.59	5.87	1.47	0.25	1.32	1.16	0.26	0.26	7.33	7.28	0.35		0.05
Jiangxi	2007	0.31		4.24	5.54			0.73	402.2	417122	11.58	4.12	4.12			0.87	0.87	0.92	0.92	5.67	5.59			0.08
Henan	2007	0.74		6.19	4.77	32.56		0	356.4	859052	14.31	9.24	2.03	7.21		1.31	1.31	0.01		3.75	3.75	0.2
Hubei	2007	0.41		2.94	7.17	15.68		1.45	927.1	1933012	14.54	6.43	1.63	4.77	0.03	2.57	2.51	0.42	0.38	5.12	4.27			0.85
Hunan	2007	0.12	0.02	8.02	7.85		0.15	0.14	609.9	910091	10.63	4.92	2.02	2.9		2.69	2.64	0.03	0.03	2.99	2.99
Chongqing	2007	0.45		10.7	2.33			0	135.4	231918	9.83	6.4	2.88	3.49	0.03	3.22	2.93			0.21	0.14			0.07
Sichuan	2007	0.21		11.4	5.43	20.76		0.02	747.3	1525102	14.8	8.72	3.36	5.33	0.03	3.02	2.46	0.15	0.15	2.91	2.27	0.36		0.64
Guizhou	2007	0.18		21.91	3.35	0.58		0	400.1	643555	12.26	5.47	5.41	0.06		3.36	3.25	0.03	0.01	3.4	3.14			0.26
Yunnan	2007	0.84		20.42	11.11	10.54		0.55	84.3	157000	18.65	11.78	10.41	1.37		3.56	2.57	0.97	0.02	2.34	1.86			0.48
Shaanxi	2007	0.24		7.39	6.33	17.89		0.92	155.4	273749	18.87	11.23	5.23	5.81	0.19	3	1.64	0.02		4.62	3.63	1.03		0.99
Gansu	2007	0.93	0.41	35.9	5.47	29.87	0.78	0	145	233185	16.31	8.11	5.27	2.84		2.13	1.89			6.07	6.07	6.07
Qinghai	2007	0.94		9.87	8.47	12.96		0.22	148.5	277387	12.15	4.68	4.68			0.22	0.01			7.25	7.25	7.18
Jiangsu	2008	0.25		4.71	15.23	17.88	0.04	1.64	454.5	1128060	19.52	9.58	8.43	1.15		0.77	0.77	0.02	0.02	9.15	8.33	0.27		0.82
Zhejiang	2008	0.25		5.93	11.56	13.89	0.3	0.99	167.5	353412	21.41	12.85	9.77	2.75	0.33	4.09	3.3	0.29	0.24	4.18	2.7			1.48
Anhui	2008	0.25		6.67	9.67	33.8		1.11	670.4	1402685	18.45	8.7	7.54	1.16		1.06	1.06	0.07	0.07	8.62	8.4	0.5		0.22
Jiangxi	2008	0.35		13.49	8.7	0.32		0	486.3	516281	13.19	4.12	4.12			0.1	0.1	0.23	0.23	8.74	8.74	0.53
Henan	2008	0.51		9.18	4.29	25.64		0.18	376.6	970735	15.15	9.25	2.3	6.88	0.07	0.86	0.83			5.04	4.57	1.52		0.47
Hubei	2008	0.35		3.77	8.47	19.36		1.78	1089.6	2148900	15.21	7.12	2.89	4.23		2.58	2.53	0.59	0.59	4.92	3.92			1
Hunan	2008	0.13		12.53	11.18	3.95		3.38	827.6	1099327	12.07	6.62	2.83	3.79		1.95	1.95	0.07	0.07	3.43	3.43
Chongqing	2008	0.25		11.24	2.17	2.92		0	150.2	265430	10.4	7.17	3.77	3.4		2.51	2.51			0.72	0.66			0.06
Sichuan	2008	0.18		11.12	6.91	21.43		0.04	886.2	1894167	11.63	6.01	2.85	3.14	0.02	1.86	1.85	0.67		3.09	3.02			0.07
Guizhou	2008	0.12		29.29	4.37	0.19		0	412.8	603845	11.2	5.4	5.36	0.04		2.87	2.82			2.93	2.66	0.06		0.27
Yunnan	2008	0.82		25.69	13.51	14.46		0.51	149.9	246413	18.87	11.67	10.32	1.35		3.41	2.68	0.97	0.07	2.82	1.72			1.1
Shaanxi	2008	0.26		7.28	5.6	11.02		0	178.3	333531	16.93	8.95	3.64	5.31		2.01	1.95			5.97	5.97	5.97
Gansu	2008	0.67		32.28	7.43	44.26		0.87	162.1	285540	18.92	9.54	6.77	2.77		3.95	3.43	0.02		5.41	5.41	5.27
Qinghai	2008	0.81		7.16	9.37	45.05		0.18	169.8	348048	12.16	4.61	4.61			0.41	0.41			7.14	6.76	6.76		0.38
Jiangsu	2009	0.22		4.27	13.8	21.04		1.37	476.3	1216923	18.93	9.49	8.18	1.31		0.65	0.62			8.79	7.6	0.18	3.88	1.19
Zhejiang	2009	0.25		5.41	13.39	12.23	0.04	0.33	185.8	370216	21.06	12.86	10.65	2.21		3.99	3.88	0.12	0.12	4.09	3.37		1.16	0.72
Anhui	2009	0.21		5.94	9.99	32.16		3.25	721.8	1577714	18.09	9.01	8.03	0.98		1.54	1.22	0.11	0.11	7.43	7.24	0.12	2.58	0.19
Jiangxi	2009	0.26		9.39	13.26	10.83		0.84	538.5	609619	14.17	3.95	3.95			0.14	0.14	0.73	0.73	9.35	9.35		8.35
Henan	2009	0.59		3.8	2.98	29.54		3.54	382	930700	14.01	7.48	1.5	5.98		1.42	1.42			5.11	4.86	2.02	2.53	0.25
Hubei	2009	0.38		6.96	9.88	22.1	1.32	0.78	1165.9	2365100	13.48	6.07	2.23	3.84		2.11	2.01	0.18	0.17	5.12	4.52		2.34	0.6
Hunan	2009	0.17		10.69	12.13	8.02		1.74	1016.1	1533740	12.16	6.65	3.15	3.5		2.21	1.76	0.16	0.16	3.14	3.14		0.68
Chongqing	2009	0.26		14.36	3.07	1.22		0	173.6	309515	8.88	6.42	3.84	2.58		1.61	1.49	0.03	0.03	0.82	0.56			0.26
Sichuan	2009	0.14		10.53	9.09	30.02		0	936.6	1999090	17.52	10.28	5.6	4.62	0.06	3.3	3.29			3.94	3.94		0.02
Guizhou	2009	0.16		25.05	3.63	3.94		0	466.9	703987	10.68	5.38	5.31	0.07		2.47	2.36	0.01	0.01	2.82	2.82		0.07
Yunnan	2009	0.78		20.06	13.26	18.41		0.27	253.6	414131	18.32	12.14	10.63	1.51		3.28	2.1	0.81	0.11	2.09	1.57		0.41	0.52
Shaanxi	2009	0.37		9.13	8.48	8.27		2.3	194.6	356291	14.68	8.04	3.16	4.88		3.2	3.2			3.44	3.44	1.24
Gansu	2009	0.53		22.55	6.08	49.14		0	188.9	331092	19.32	8.64	6.21	2.22	0.21	3.68	2.81	0.17		6.83	6.83	6.78
Qinghai	2009	0.8		7.27	8.83	54.02		0.19	170.3	361995	12.62	4.84	4.84			0.36	0.12			7.42	7.34	7.34		0.08
Jiangsu	2010	0.21		6.16	14.56	23.35		0.57	460.1	1124437	20.09	9.82	8.77	1.05		0.34	0.33			9.93	8.37	0.25	5.2	1.56
Zhejiang	2010	0.23		5.7	13.95	17.53	0.16	0.63	184.5	332581	20.92	12.18	9.62	2.44	0.12	3.71	3.24	0.24	0.24	4.79	4.63		2.45	0.16
Anhui	2010	0.17		5.92	11.16	38.27	0.23	1.32	691	1337270	19.61	8.87	8.01	0.86		1.51	1.51	0.07	0.07	9.16	8.54	0.28	4.53	0.62
Jiangxi	2010	0.37		5.7	10.79	16.43		0.48	547	638423	15.86	4.3	4.3			1.28	1.25	0.92	0.92	9.36	9.33	0.25	7.43	0.03
Henan	2010	0.47		0.04	2.96	34.48		0.7	393.3	888652	12.65	5.47	2.01	3.46		0.28	0.28			6.9	5.75		3.45	1.15
Hubei	2010	0.35		3.68	11.14	33.89	0.76	0.99	1159.7	2325700	15.24	6.22	2.78	3.44		1.55	1.3	0.17	0.17	7.3	6.27	0.01	3.56	1.03
Hunan	2010	0.17		10.93	9.5	22.51		0.85	1088.9	1666214	10.8	5.99	3.57	2.42		1.72	1.47	0.07	0.07	3.02	3.02		1.39
Chongqing	2010	0.25		16.1	3.19	1.5		0	191.8	342193	9.35	6.78	3.64	3.14		1.66	1.63			0.91	0.91		0.5
Sichuan	2010	0.13		12.11	10	40.3		0.14	947.2	2052080	14.26	8.36	4.37	3.99		1.84	1.83	0.16		3.9	3.9		2.05
Guizhou	2010	0.17		25.26	3.69	6.36		0	479.2	516189	11.43	5.42	5.38	0.04		2.95	2.95	0.01	0.01	3.05	2.88		0.51	0.17
Yunnan	2010	0.77		16.43	16.49	19.61		1.14	269.8	259822	17.98	9.99	8.78	1.21		3.87	3.73	1.08		3.04	2.69		2	0.35
Shaanxi	2010	0.36		6.22	10.42	16.82		1.25	201.8	372741	17.55	6.46	3.6	2.86		3.27	3.27			7.82	7.82	1.62	6.15
Gansu	2010	0.62		18.25	10.03	47.5		0	182.9	332217	16.45	8.07	5.36	2.71		3.6	3.26			4.78	4.78	4.54
Qinghai	2010	0.7		8.98	9.14	65.63		0.26	173.2	337323	12.76	4.97	4.97			0.31	0.05			7.48	7.48	7.48
Jiangsu	2011	0.22		6.54	15.68	20.69		1.26	441.3	1052453	21.02	8.9	8.52	0.38		0.99	0.57			11.13	9.52	0.33	5.68	1.61
Zhejiang	2011	0.27		7.76	16.61	24.05	0.09	1.71	171.6	335900	19.3	10.24	8.91	1.33		3.25	3.16	0.16	0.16	5.65	5.48		3.66	0.17
Anhui	2011	0.15		10.75	13.95	44.13	0.41	2.55	640.4	1227783	17.14	7.46	7.03	0.43		1.13	1.13	0.05	0.05	8.5	8.19	0.18	5.63	0.31
Jiangxi	2011	0.34		9.16	14.29	24.5		0	542.6	666568	14.18	3.84	3.62	0.22		1.71	0.78	0.4	0.37	8.23	7.97		6.76	0.26
Henan	2011	0.44		0.04	6.29	13.31		4.05	383.5	773187	10.83	6.84	1.57	5.27						3.99	3.99		3.61
Hubei	2011	0.35		3.02	13.58	42.43	1.89	1.53	1141.4	2203900	15.27	6.08	3.29	2.79		1.21	1.02	0.45	0.39	7.53	7.08		4.62	0.45
Hunan	2011	0.17		8.1	11.49	26.64		1.4	1167.2	1819606	12.49	6.47	5.12	1.35		2.37	2.37	0.04	0.04	3.61	3.56		0.79	0.05
Chongqing	2011	0.24		16.63	2.64	3.39	0.21	0	196.2	351400	9.12	6.64	3.78	2.86		1.47	1.47			1.01	0.86		0.32	0.15
Sichuan	2011	0.13		12.25	9.68	47.49		0.21	964.2	2143669	14.64	7.63	4.13	3.5		2.16	2.16			4.85	4.85		2.16
Guizhou	2011	0.21		25.89	3.87	17.16		0	489	718090	11.62	5.89	5.89			2.85	2.65			2.88	2.16	0.03	0.74	0.72
Yunnan	2011	0.74		16.77	18.03	26.66		0.28	272.9	518445	19.15	12.48	11.28	1.2		2.89	2.89	0.78	0.48	3	2.7		1.35	0.3
Shaanxi	2011	0.36		10.91	10.06	8.89		1.9	203.3	383621	21.9	11.75	5.53	6.22		3.24	3.24			6.91	6.91	2.27	3.99
Gansu	2011	0.54		13.05	15.41	55.15		0.5	184.8	331446	17.48	8.3	5.76	2.54		3.21	3.04			5.97	5.97	5.86
Qinghai	2011	0.84		7.8	8.6	74.29		0.24	163.6	326924	13.24	5.03	5.03							8.21	8.21	8.21
Jiangsu	2012	0.23		5.6	15.49	25.93		1.56	421.3	1091272	20.7	9.18	8.67	0.51		0.34	0.34			11.18	10.45	0.32	5.77	0.73
Zhejiang	2012	0.28		5.34	18.45	34.89	0.16	0.95	165.6	320853	19.61	11.34	9.62	1.72		3.57	3.04	0.04	0.04	4.66	4.58		3.57	0.08
Anhui	2012	0.19		5.61	12.19	51.61	0.01	2.16	609.6	1343182	18.21	8.02	7.49	0.53		0.67	0.67	0.16	0.16	9.36	9.04	0.26	5.95	0.32
Jiangxi	2012	0.32		2.99	16.53	31.69		0	551.9	687541	11.58	3.49	3.35	0.14		0.87	0.87	0.07		7.15	6.92		6.02	0.23
Henan	2012	0.59		0.63	5.89	37.32		0.21	380.4	876064	12.19	6.17	1.67	4.5		0.56				5.46	5.01		3.66	0.45
Hubei	2012	0.36		3.57	14.64	47.47	2.02	1.11	1167.3	2300323	15.48	5.97	3.55	2.4	0.02	1.12	1.09	0.13	0.13	8.26	8.06		5.06	0.2
Hunan	2012	0.15		14.59	15.1	43.42		0.44	1201.3	1785723	13.16	6.32	5.16	1.16		2.53	2.49	0.69	0.69	3.62	3.62		1.48
Chongqing	2012	0.24		16.64	4.73	2.03	0.09	0	204.6	377102	8.34	5.6	3.11	2.49		0.93	0.93			1.81	1.63		0.53	0.18
Sichuan	2012	0.14		12.21	11.15	52.2		0	981.4	2220860	14.4	6.59	4.09	2.5		2.01	2.01			5.8	5.8		3.74
Guizhou	2012	0.23		26.1	5.2	28.92	3.21	0	497	781764	11.96	5.83	5.83			2.34	1.88			3.79	3.25		1.33	0.54
Yunnan	2012	0.75		19.94	22.43	27.85		2	281.2	534987	17.18	10.64	9.66	0.98		3.03	2.78	0.81	0.76	2.7	2.03		1.77	0.67
Shaanxi	2012	0.36		9.7	10.14	8.18		2.28	202.1	399403	21.29	11.49	4.97	6.52		2.65	2.65			7.15	7.15	2.44	4.68
Gansu	2012	0.54		14.95	13.05	84.72		0	175	339294	15.93	7.69	6.33	1.36		1.84	1.8			6.4	6.4	5.9
Qinghai	2012	0.83		8.59	9.07	88.53		0	160	345316	13.14	5.08	5.08			0.21	0.21			7.85	7.85	7.81
Jiangsu	2013	0.21		6.59	16.69	26.58		1.68	413.9	1132644	20.24	8.91	8.22	0.69		0.61	0.43	0.02	0.02	10.7	10.23	0.37	5.91	0.47
Zhejiang	2013	0.24		6.86	17.83	38.12		0.14	159.6	316686	18.99	9.4	8.53	0.87		2.07	2.01	0.16	0.16	7.36	7.35		5	0.01
Anhui	2013	0.2		3.13	14.43	47.08	0.09	1.62	568.1	1300500	17.47	7.42	7.06	0.36		0.79	0.79	0.16	0.16	9.1	8.67	0.35	6.66	0.43
Jiangxi	2013	0.28		12.49	20.26	32.75	0.27	0.27	548	704270	10.51	1.63	1.63			1.41	1.03	0.31	0.31	7.16	6.97		5.03	0.19
Henan	2013	0.4		0.44	4.19	39.44		0.43	371.3	898035	12.89	4.35	1.59	2.76						8.54	8.54		7.56
Hubei	2013	0.35		4.28	15.08	52.04	2.12	0.75	1226.3	2504700	16.02	5.65	3.29	2.36		0.92	0.92	0.08	0.08	9.37	8.88		5.01	0.49
Hunan	2013	0.16		17.13	14.63	47.34		0.64	1259.9	1946089	12.25	5.63	4.58	1.05		2.25	2.09	0.34	0.34	4.03	4.03		2.1
Chongqing	2013	0.22		17.74	5.35	8.26	0.17	0	215.6	401045	9.51	7.28	4.24	3.04		0.61	0.61			1.62	1.62		0.54
Sichuan	2013	0.13		12.12	9.92	55.08		0.62	998	2240360	17.06	6.27	3.84	2.43		1.04	1.04			9.75	9.75		5.13
Guizhou	2013	0.23		23.65	5.06	45.84	4.09	0	506.7	817767	11.44	5.82	5.81	0.01		2.41	2			3.21	2.54		1.04	0.67
Yunnan	2013	0.73		16.11	21.15	25.14		1.44	294.9	506870	20.08	10.94	9.55	1.37	0.02	4.09	3	1.09	0.84	3.96	3.87	0.18	1.58	0.09
Shaanxi	2013	0.38		10.4	10.83	7.86		2.38	204.4	396664	21.4	10.54	4.19	6.35		2.89	2.89			7.97	7.97	2.36	5.61
Gansu	2013	0.51		7.59	10.83	98.52	0.66	0	170	331622	18.52	10.04	7.65	2.39		2.17	2.08			6.31	6.31	6.12
Qinghai	2013	0.59		7.69	8.74	100.62		0	154.2	319277	13.76	5.17	5.17			0.27	0.27			8.32	8.32	7.8
Jiangsu	2014	0.21		5.56	17.61	23.83		3.25	398.1	1100550	21.57	9.45	8.9	0.55		0.56	0.56			11.56	10.98	0.49	6.77	0.58
Zhejiang	2014	0.3		2.95	19.06	57.31	0.21	0.83	126.4	258959	20.69	11.1	9.57	1.53		2.59	2.5	0.04	0.04	6.96	6.89		4.69	0.07
Anhui	2014	0.21		2.83	17.24	52.71	1.54	0.46	551	1277548	17.95	6.99	6.89	0.1		0.51	0.51	0.08	0.08	10.37	10.37	0.33	6.25	1.07
Jiangxi	2014	0.29		13.97	19.87	29.64		0	547.9	723497	12.4	2.62	2.62			1.46	1.17	0.28	0.28	8.04	7.57		6.55	0.47
Henan	2014	0.47		0.28	5.78	60.41		0.66	361.6	863900	14.36	4.16	1.84	2.32						10.2	9.48		7.28	0.72
Hubei	2014	0.36		3.7	16.86	79.2	1.81	0.84	1248.7	2571600	16.23	5.53	2.96	2.57		0.69	0.69	0.12	0.12	9.89	9.43		5.59	0.46
Hunan	2014	0.17		14.73	15.82	63.2		1.04	1298.2	2026471	11.8	5.16	4.6	0.56		1.85	1.85	0.23	0.23	4.56	4.56		2.06
Chongqing	2014	0.2		16.68	5.75	8.02	1.36	0	232.6	439652	9.39	5.93	3.99	1.94		1.13	1.13			2.33	1.94		0.83	0.39
Sichuan	2014	0.13		12.97	10.25	65.12		0.43	1016.7	2331233	16.13	6.31	3.88	2.43		0.81	0.81			9.01	8.16		4.11	0.85
Guizhou	2014	0.21		18.11	5.69	56.38	6.28	0	521.6	866922	13.41	6.44	6.44			1.92	1.92			5.05	4.65		1.37	0.4
Yunnan	2014	0.82		16.59	20.16	38.53		1.32	296.2	549324	20.99	10.8	10.25	0.55		4.25	3.09	1.11	0.65	4.83	2.85	0.14	1.45	1.98
Shaanxi	2014	0.38		9.7	12.15	10.25		2.05	203.6	415629	22.98	12.41	7.19	5.22		1.62	1.62			8.95	8.95	5.87	3.06
Gansu	2014	0.52		13.04	13.43	107.75		0	167.8	345336	22.5	12.69	11.03	1.66		1.64	1.55			8.17	8.17	7.96
Qinghai	2014	0.62		8.63	8.92	106.45		0	148.2	310385	13.3	5.58	5.58			0.13	0.13			7.59	7.59	7.44	0.04
Jiangsu	2015	0.2		7.06	17.88	27.9		3.73	375.7	1063384	22	9.48	8.94	0.54		0.43	0.43			12.09	11.26		7.27	0.83
Zhejiang	2015	0.29		2.1	19.48	102.25	0.01	0.65	122.3	251190	20.29	9.76	8.66	1.1		2.39	2.2	0.24	0.24	7.9	7.86		5.8	0.04
Anhui	2015	0.21		3.69	17.58	67.33	1.79	0	532.4	1262860	18.82	7.7	7.63	0.07		0.65	0.65	0.1	0.1	10.37	10.33	0.55	5.54	0.04
Jiangxi	2015	0.3		11.51	19.84	36.32	0.18	0.84	545	739408	12.98	3.16	3.16			1.36	1.29	0.59	0.59	7.87	7.67		6.22	0.2
Henan	2015	0.39		3.18	7.37	62.67		0	348.2	860982	15.11	3.99	1.5	2.49		0.37				10.75	10.75		6.96
Hubei	2015	0.38		3.96	20.22	83.92		1.73	1232.1	2551881	17.26	5.03	3.03	2		0.64	0.64	0.08	0.08	11.51	11.06		4.45	0.45
Hunan	2015	0.15		17.78	18.42	72.76	2.79	1.4	1314.6	2108109	12.89	5.24	4.79	0.45		1.92	1.92	0.26	0.26	5.47	5.47		3.58
Chongqing	2015	0.23		18.13	6.32	6.9		0	242.5	467256	9.45	6.08	3.57	2.51		1.43	1.43	0.13	0.13	1.81	1.81		0.61
Sichuan	2015	0.13		12.74	10.78	65.76	1.25	0.33	1027.4	2385250	15.86	6.06	3.92	2.14		0.87	0.87			8.93	8.06		4.45	0.87
Guizhou	2015	0.26		22.03	4.64	51.64		0	528.1	890296	14.44	6.53	6.53			2.18	2.16	0.25	0.25	5.48	5.1	0.16	1.9	0.38
Yunnan	2015	0.72		14.33	16.45	52.79	8.81	0.82	293.2	560698	17.81	10.66	10.06	0.6		2.77	2.53	0.29	0.27	4.09	2.36	0.15	1.32	1.73
Shaanxi	2015	0.37		9.27	11.92	8.65		2.8	204.3	431857	20.02	11.31	5.49	5.82		2	2			6.71	6.71	3.63	3.08
Gansu	2015	0.5		9.82	12.08	127.48		0	161.6	339746	22.66	12.64	11.62	1.02		1.26	1.18			8.76	8.76	8.61
Qinghai	2015	0.58		5.98	8.42	98.48		0	142.1	300573	13.95	5.44	5.44							8.51	8.51	8.45	0.06
Jiangsu	2016	0.17		5.81	17.68	25.63		2.97	336	525986	22.99	9.39	9.31	0.08		0.46	0.46			13.15	12.82		8.03	0.33
Zhejiang	2016	0.25		1.27	20.01	76.41		0.72	117.6	193700	20.14	9.74	9.38	0.36		1.74	1.54	0.17	0.17	8.49	8.4		6.09	0.09
Anhui	2016	0.21		7.49	21.24	68.21	1.05	0.4	500.7	875818	19.71	7.59	7.56	0.03		0.54	0.54	0.07	0.07	11.5	11.24	0.53	6.26	0.26
Jiangxi	2016	0.33		10.05	19.81	34.41	0.64	0.32	534.2	689120	12.93	2.65	2.64	0.01		0.84	0.78	0.94	0.94	8.5	8.34		6.93	0.16
Henan	2016	0.34		1.45	5.19	65.83		0	324.4	409046	15.65	4.91	1.5	3.41		0.45				10.28	10.28		7.15
Hubei	2016	0.39		5.63	16.74	82.21	1.8	1.46	1150.4	2111367	16.42	4.59	2.78	1.81		0.5	0.5	0.12	0.12	11.2	10.99		4.28	0.21
Hunan	2016	0.15		21.05	20.05	77.18		1.2	1306.8	1912990	12.53	5.55	5.49	0.06		1.85	1.85	0.19	0.19	4.93	4.93		3.92
Chongqing	2016	0.23		18.65	5.31	7.21	1.16	0	252	462397	9.38	5.64	3.1	2.54		0.93	0.93			2.82	2.77		1.14	0.05
Sichuan	2016	0.13		12.53	11.53	65.24	0.02	0.08	1034.3	2769958	15.79	5.81	4.14	1.67		0.49	0.49			9.48	8.36		4.52	1.12
Guizhou	2016	0.24		13.7	5.12	39.39	8.47	0	530	885510	14.87	6.54	6.54			1.85	1.84	0.11	0.11	6.37	6.28	0.19	2.64	0.09
Yunnan	2016	0.71		15.74	18.47	55.87		1.25	293	475072	18.98	10.75	10.28	0.46	0.01	3.63	2.63	1.27	1.25	3.32	2.51	0.1	1.44	0.81
Shaanxi	2016	0.37		9.28	11.96	9		2.86	203.9	374900	20.56	10.68	5.15	5.53		2.11	2.11			7.78	7.78	4.15	3.63
Gansu	2016	0.53		11.22	11.79	138.08		0	162.3	411007	21.11	10.31	9.61	0.7		1.04	1.04			9.76	9.76	8.54	1.07
Qinghai	2016	0.9		5.87	8.73	99.59		0	140.1	310626	14.06	5.49	5.49							8.57	8.57	8.52	0.05
Jiangsu	2017	0.17		4.72	18.31	23.62		1.72	175.3	497711	23.99	9.98	9.79	0.19		0.52	0.52			13.47	13.47		7.22
Zhejiang	2017	0.31		3.08	22.24	80.49		0.3	96.2	202000	19.39	8.84	7.82	1.02		1.94	1.73	0.02	0.02	8.59	8.57		5.79	0.02
Anhui	2017	0.24		12.28	20.13	74.83	1.19	1.2	354.1	831562	20.55	7.31	7.28	0.03		0.46	0.46	0.47	0.47	12.31	12.21	0.4	7.27	0.1
Jiangxi	2017	0.34		10.47	23.22	49.95	0.3	0	509.1	704035	14.8	2.68	2.61	0.07		1.12	0.86	1.78	1.78	9.21	9.01		7.6	0.2
Henan	2017	0.37		1.68	6.43	60.45		0	155.7	420842	15.25	5	1.31	3.69		0.41				9.85	9.85		6.58
Hubei	2017	0.38		13.29	15.88	92.92	2.39	2.19	971.2	2131710	15.86	3.86	2.22	1.64		0.47	0.47	0.16	0.15	11.37	11.25		4.08	0.12
Hunan	2017	0.18	0.1	31.6	27.17	102.63	0.57	0.79	1188.9	1956971	13.61	7.23	6.29	0.94		1.48	1.48	0.13	0.13	4.77	4.77		1.91
Chongqing	2017	0.16		15.09	6.14	11.09	1.03	0	244.3	474285	9.27	5.42	3.47	1.95		0.8	0.8			3.06	3.06		1.41
Sichuan	2017	0.13		12.42	12.61	79.83		0.06	1206.2	2880335	16.72	6.34	4.29	2.05		0.59	0.56			9.79	8.21		4.47	1.58
Guizhou	2017	0.24		12.17	6.95	50.75	8.68	0	516.1	880245	14.5	6.75	6.75			1.72	1.58	0.15	0.15	5.88	5.8	0.16	3.46	0.08
Yunnan	2017	0.76		13.62	20.92	58.48		1.03	232.1	475215	18.71	11.78	11.39	0.39		2.51	1.92			4.42	3.12	0.09	2	1.3
Shaanxi	2017	0.37		8.77	11.97	8.71		3.22	179.6	382400	20.33	10.93	5.41	5.52		2	2			7.4	7.4	3.95	3.45
Gansu	2017	0.51		2.18	11.49	146.45		0	198.5	437761	19.7	9.72	8.99	0.73		1.55	1.55			8.43	8.43	5.5	0.09
Qinghai	2017	0.59		5.04	9.58	108.03		0	153.6	290200	14.21	5.18	5.18			0.2	0.2			8.83	8.83	8.8	0.03
Jiangsu	2018	0.16		7.12	20.32	17.3		0.48	159.1	456998	22.15	9.76	9.67	0.09		0.31	0.31			12.09	11.66	0.07	7.05	0.43
Zhejiang	2018	0.44		1.87	21.84	96.96		0.57	104.9	233353	18.7	7.63	7.55	0.08		1.5	1.41	0.09	0.09	9.48	9.33		8.7	0.15
Anhui	2018	0.27		13.97	22.17	72.97	1.13	0.96	357	842971	20.94	7.88	7.83	0.05		0.39	0.39	0.43	0.43	12.24	12.04	0.87	7.39	0.2
Jiangxi	2018	0.34		11.88	29.09	53.87		0	483	690804	14.4	2.82	2.68	0.14		0.82	0.74	1.65	1.55	9.1	8.68		6.83	0.42
Henan	2018	0.51		1.91	6.92	55.06		0	145	389651	12.78	2.89	0.95	1.94		0.84				9.04	9.04		6.39
Hubei	2018	0.4		6.88	16.63	91.53	1.62	2.53	933	2053137	17.44	4.88	3.28	1.6		0.35	0.35	0.17	0.17	12.04	11.93		4.91	0.11
Hunan	2018	0.2		13.93	24.19	107.31	0.99	0.16	1222.2	2041729	12.89	3.92	3.81	0.11		1.69	1.69	0.1	0.1	7.18	7.18		5.06
Chongqing	2018	0.18		16.36	5.23	9.59	0.63	0	250.2	486026	9.06	5.05	3.33	1.72		1.02	1.02			2.99	2.96		1.73	0.03
Sichuan	2018	0.13		12.68	11.78	86.72	1.02	0	1218.5	2922031	16.1	5.14	3.75	1.39		0.5	0.5			10.46	9.26		5.1	1.2
Guizhou	2018	0.24		12.96	6.09	62.07	9.39	0	497.7	862177	14.73	6.71	6.61		0.1	1.68	1.68			6.33	6.18	0.15	4.01	0.15
Yunnan	2018	0.76		16.03	19.02	54.27		0.74	256.1	525187	19.66	11.23	11	0.23		2.4	1.88	0.45	0.36	5.59	4.37	0.07	2.83	1.22
Shaanxi	2018	0.38		8.03	13.42	44.49		3.52	175.9	369129	19.4	9.59	4.12	5.47		2.34	2.34			7.47	7.47	3.91	3.56
Gansu	2018	0.48		2.54	10.83	140.50		0	174.9	355261	19.83	8.89	8.89			1.85	1.85			9.09	9.09	8.23	0.86
Qinghai	2018	0.6		4.85	9.85	112.5		0	145.8	281295	14.13	5.3	5.3			0.22	0.22			8.61	8.61	8.58	0.03
Jiangsu	2019	0.17		4.28	21.38	19.69		0.2	173.5	504542	22.23	9.58	9.51	0.07		0.28	0.28			12.37	12.37		7.53
Zhejiang	2019	0.3		1.46	20.32	107.98		0.41	116.8	256591	18.13	5.89	5.76	0.13		0.69	0.65	0.03	0.03	11.52	11.48		10.31	0.04
Anhui	2019	0.28		12.3	23.99	76.52	1.12	1.51	363.9	872824	20.91	6.85	6.85			0.34	0.21	0.18	0.18	13.53	13.53	0.9	7.87
Jiangxi	2019	0.3		14.65	27.53	73.37	0.23	0	482.3	688661	14.74	2.74	2.65	0.09		0.82	0.82	1.45	1.45	9.72	9.55		0.59	0.17
Henan	2019	0.58		1.47	10.25	66.52		0	171.5	442494	16.03	3.01	1.6	1.41		0.46		1.04	1.04	11.53	11.53		8.99
Hubei	2019	0.38		7.68	18.42	96.11	0.47	5.29	938.3	2113473	17.18	4.25	2.96	1.29		0.15	0.15	0.5	0.5	12.27	12.19		4.32	0.08
Hunan	2019	0.21		13.45	23.98	108.44	0.97	2.85	1241	2080081	13.65	4.37	4.22	0.15		1.33	1.33	0.07	0.07	7.88	7.88		4.89
Chongqing	2019	0.15		13.08	4.16	14.29	0.89	4.83	255	498933	8.8	4.82	3.74	1.08		0.69	0.69			3.3	3.28		2.19	0.02
Sichuan	2019	0.13		12.75	11.92	80.92	0.4	0.93	1222.6	2964476	15.92	4.81	3.6	1.18	0.03	0.47	0.47			10.64	9.57		5.34	1.07
Guizhou	2019	0.26		11.38	5.79	62.17	10.89	0	445.7	772491	14.17	6.12	6.07		0.05	1.89	1.89			6.16	6.16		3.67
Yunnan	2019	0.71		15.91	27.33	70.09		0.58	260.9	541015	20.24	10.46	10.27	0.19		2	1.96	0.95	0.13	6.83	5.89	0.1	3.8	0.94
Shaanxi	2019	0.39		8.34	14.04	48.94		0	175.5	372608	19.88	10	4.52	5.48		1.82	1.82			8.06	8.06	3.95	4.11
Gansu	2019	0.52		0.87	11.65	146.36		0	164.2	356129	20.39	9.21	9.21			2.49	2.42			8.67	8.67	8.04	0.63
Qinghai	2019	0.62		5.1	10.19	114.17		0	140.4	286567	14.04	5.11	5.11			0.06	0.06			8.87	8.87	8.87
Jiangsu	2020	0.16		3.55	20.89	17.83		0.44	172.9	512074	20.89	7.82	7.82			0.16	0.16			12.89	12.89	0.14	7.15
Zhejiang	2020	0.35		1.62	25.88	108.23		0.44	113.7	257502	18.11	5.31	5.23	0.08		0.52	0.5	0.04	0.04	12.24	12.2		10.93	0.04
Anhui	2020	0.28		10.16	21.75	85.36	0.81	4.56	350.4	853021	20.34	7.52	7.52			0.24	0.24	0.37	0.37	12.21	11.73	0.68	8.03	0.48
Jiangxi	2020	0.29		12.93	29.99	81.43	0.5	0.18	475.4	678085	16.88	2.59	2.53	0.06		0.8	0.8	1.52	1.52	11.97	11.65		9.3	0.32
Henan	2020	0.49			7.93	79.02		2.81	177	459460	14.69	2.55	1.1	1.45		0.26				11.88	11.88		5.98
Hubei	2020	0.38		8.64	20.93	98.24	0.58	1.85	1034.4	2410594	17.99	4.48	3.18	1.3		0.04	0.04	0.63	0.63	12.83	12.76		4.55	0.07
Hunan	2020	0.22		14.4	22.49	110.13	2.1	0.08	1326.4	2287365	14.92	5.34	5.19	0.15		1.12	1.12			8.45	8.45		4.43
Chongqing	2020	0.14		13.41	5.02	10.55	1.39	0	258.3	513672	8.58	4.41	3.39	1.02		0.54	0.54			3.62	3.62		2.06
Sichuan	2020	0.13		11.36	12.67	81.88	0.39	0	1292.2	3171980	16.05	4.79	3.76	1.03		0.37	0.37			10.89	9.93		5.42	0.96
Guizhou	2020	0.21		8.6	6.71	63.08	10.22	0	430.9	761651	15.87	6.26	6.25		0.01	1.83	1.8			7.77	7.68		5.45	0.09
Yunnan	2020	0.67		14.64	28.05	53.21	2.92	1.15	257.7	542261	18.46	8.97	8.71	0.26		0.49	0.49	0.55	0.39	8.46	7.65	0.05	1.95	0.81
Shaanxi	2020	0.41		5.48	14.57	56.4		0	175.7	375113	20.61	9.91	4.43	5.48		1.47	1.47			9.25	9.25	4.63	4.62
Gansu	2020	0.52	0.07		11.56	137.04		0	148.8	339260	22.95	9.75	9.65	0.1		0.65	0.65	0.1	0.1	12.44	12.44	10.4	0.71
Qinghai	2020	0.73			46.44	74.86		6.66	142.5	300605	19.8	6.24	6.24					0.33		13.23	13.23	13.23
Inner Mongolia	2021	0.52	0.45	13.29	13.21	58.07		8.79	223.9	322000	4.57	0.28	0.14	0.14						4.29	4.29	2.47	1.12
Jiangsu	2021	0.16		6.11	23.01	17.51		0.45	193.1	564000	21.46	8.38	8.38			0.22	0.22			12.85	12.85		7.49
Zhejiang	2021	0.33		2.28	26.86	122.33	0.01	0.41	120.1	258000	19.84	6.08	5.11	0.97		0.39	0.39	0.02	0.02	13.35	13.35		9.92
Anhui	2021	0.29		10.86	24.73	92.99	0.78	1.32	372.9	911000	21.27	7.03	7.03			0.19	0.19	0.48	0.48	13.59	13.35	0.96	8.61	0.24
Jiangxi	2021	0.34		10.21	29.94	83.50	0.89	0	504.5	734000	17.7	3.41	3.41			0.29	0.27	1.60	1.60	12.41	12.41		10.09
Henan	2021	0.48		1.70	9.74	81.11	0.43	0.74	189.9	494000	16.92	3.00	1.61	1.39						13.93	13.93		7.01
Hubei	2021	0.37		6.89	20	106.14	0.84	1.75	1094.0	2518000	17.55	3.47	2.75	0.72		0.1	0.1	0.23	0.23	13.75	13.75		6.41
Hunan	2021	0.25		11.42	24.83	104.17	1.22	0	1351.6	2303000	17.03	5.8	5.41	0.39		1.08	1.08			10.15	10.15		5.08
Chongqing	2021	0.13		12.12	5.05	11.55	0.51	0	261.5	525000	8.43	4.51	3.26	1.25		0.6	0.6			3.32	3.32		1.66
Sichuan	2021	0.13		11.50	12.34	78.56	0.37	0	1354.1	3387000	16.22	4.5	3.55	0.95		0.29	0.29			11.43	10.12		5.30	1.31
Guizhou	2021	0.22		10.58	5.41	79.35	5.01	0	446.7	809000	15.45	6.62	6.62			1.82	1.38	0.08	0.07	6.92	6.82		4.53	0.1
Yunnan	2021	0.57		3.85	30.4	87.39	3.39	0.84	253.2	545000	22.57	10.44	10.24	0.19	0.01	1.31	1.31	0.45	0.24	10.36	10.27		4.1	0.09
Shaanxi	2021	0.39		5.59	14.69	121.01		0	178.4	390000	18.9	9.03	3.49	5.54		1.55	1.55			8.32	8.32	0.74	7.58
Gansu	2021	0.52			11.27	147.75		0	144.0	337000	21.92	9.24	9.06	0.18		1.24	1.24			11.44	11.44	8.39	0.99
Qinghai	2021	1.05		9.15	10.19	120.63		0	142.4	317000	14.94	4.41	4.41			0.03	0.03			10.49	10.34	10.34		0.15
Inner Mongolia	2022	0.59	0.16	12.55	5.12	93.6		4.95	253.7	370000	5.37									5.38	5.38	4.03
Jiangsu	2022	0.16		5.94	21.30	17.21		1.2	188.6	557000	22.42	8.84	8.73		0.11	0.1	0.1			13.47	13.47		7.81
Zhejiang	2022	0.35		1.77	27.37	103.05	0.58	0.49	124.1	273000	18.66	6.1	5.79	0.31		0.65	0.64	0.09	0.09	11.81	11.78		9.46	0.03
Anhui	2022	0.3		9.79	25.83	103.37	0.86	1.47	393.2	964000	21.09	7.29	7.29			0.15	0.15	0.43	0.43	13.23	13.13	0.62	8.96	0.1
Jiangxi	2022	0.35		9.61	30.6	107.45	1.05	0	524.6	791000	18.02	2.55	2.55			0.59	0.23	1.58	1.58	13.29	13.29		11.14
Henan	2022	0.47		1.59	10.77	95.06		5.28	187.4	490000	17.72	3.23	1.00	2.23						14.49	14.49		12.48
Hubei	2022	0.41		8.57	26.1	122.22	0.83	1.36	1152.4	2742000	17.97	3.87	3.43	0.44		0.1	0.1	0.51	0.51	13.5	13.5		5.18
Hunan	2022	0.28		3.58	24.79	122.98	1.04	0	1388.6	2438000	18.04	5.92	5.59	0.33		1.28	1.28			10.84	10.84		5.50
Chongqing	2022	0.13		13.02	5.85	14.08	1.41	0	269.7	547000	8.38	4.31	3.23	1.08		0.44	0.44			3.63	3.63		1.59
Sichuan	2022	0.12		10.98	15.52	82.6	0.35	0	1386.6	3541000	16.12	4.49	3.59	0.9		0.28	0.28			11.34	10.31		5.54	1.03
Guizhou	2022	0.2		10.00	5.97	73.7	10.87	0	506.5	947000	15.56	6.27	6.21		0.06	1.41	1.39			7.87	7.76		5.64	0.11
Yunnan	2022	0.53		2.36	26.7	86.03	3.56	1.07	251.8	539000	17.5	6.81	6.64	0.17		0.55	0.55	0.18		9.96	9.87		1.69	0.09
Shaanxi	2022	0.41		5.59	14.58	131.07		0	167.1	359000	18.76	9.55	4.13	5.42		1.59	1.59			7.61	7.61	1.12	6.49
Gansu	2022	0.48	0.36		12.39	161.70		0	152.8	365000	21.99	9.68	9.49	0.19		0.9	0.9			11.40	11.40	10.76	0.28
Qinghai	2022	0.6		8.94	12.13	115.78		0	145.6	308000	14.92	4.56	4.56			0.1	0.1			10.26	10.26	10.26
